# Supplementary material for: Application of ATAC-Seq for genome-wide analysis of the chromatin state at single myofiber resolution
Source: eLife journal article supplement (doi:10.7554/elife.72792), 2022-02-21
Supplement: supp [file elife-72792-supp-v1.zip]

Archive with 17 entries (17 files):
- elife_poa_e72792_Transparent_Reporting_File.pdf
- elife_poa_e72792_Source_data.zip
- elife_poa_e72792_Figure_1_figure_supplement_1.pdf
- elife_poa_e72792_Figure_2_figure_supplement_1.pdf
- elife_poa_e72792_Figure_2_figure_supplement_2.pdf
- elife_poa_e72792_Figure_2_figure_supplement_3.pdf
- elife_poa_e72792_Figure_3_figure_supplement_1.pdf
- elife_poa_e72792_Figure_3_figure_supplement_2.pdf
- elife_poa_e72792_Figure_3_figure_supplement_3.pdf
- elife_poa_e72792_Figure_4_figure_supplement_1.pdf
- elife_poa_e72792_Figure_4_figure_supplement_2.pdf
- elife_poa_e72792_Figure_5_figure_supplement_1.pdf
- elife_poa_e72792_Figure_6_figure_supplement_1.pdf
- elife_poa_e72792_Figure_6_figure_supplement_2.pdf
- elife_poa_e72792_Figure_6_figure_supplement_3.pdf
- elife_poa_e72792_Figure_6_figure_supplement_4.pdf
- elife_poa_e72792_Figure_6_figure_supplement_5.pdf
