# Supplementary material for: Application of ATAC-Seq for genome-wide analysis of the chromatin state at single myofiber resolution
Source: eLife journal article supplement (doi:10.7554/elife.72792), 2022-02-21

Figure 4- Figure Supplement 1

**A**  
Peaks unique to uninjured fibers  
compared to MuSCs

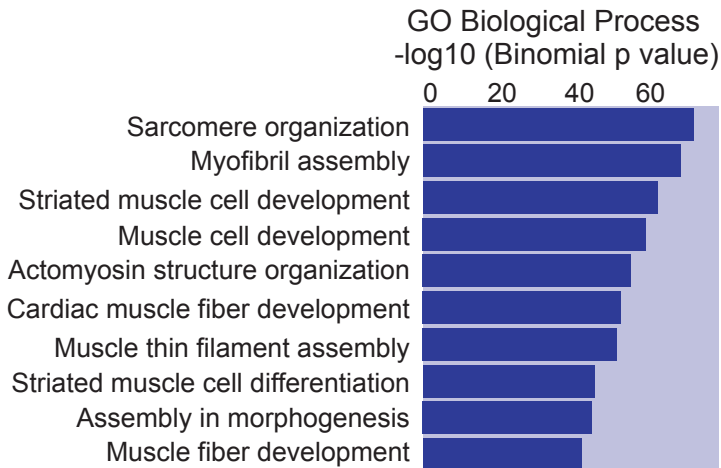

**B**  
Peaks unique to MuSCs  
compared to uninjured fibers

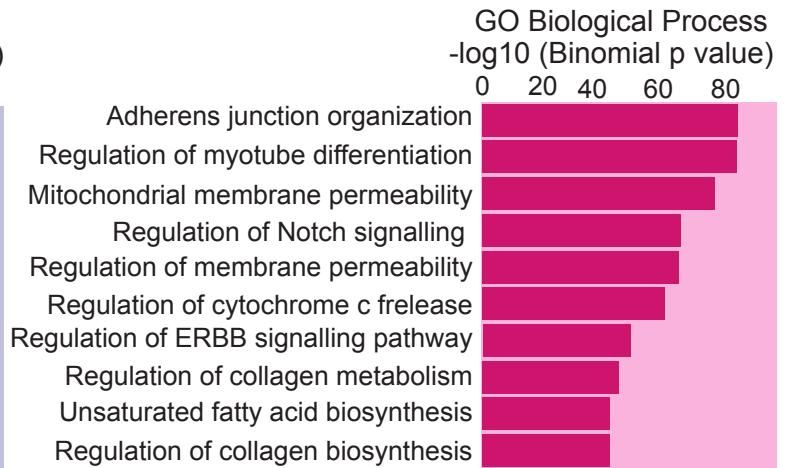

**C**  
Peaks common to MuSCs  
and uninjured fibers

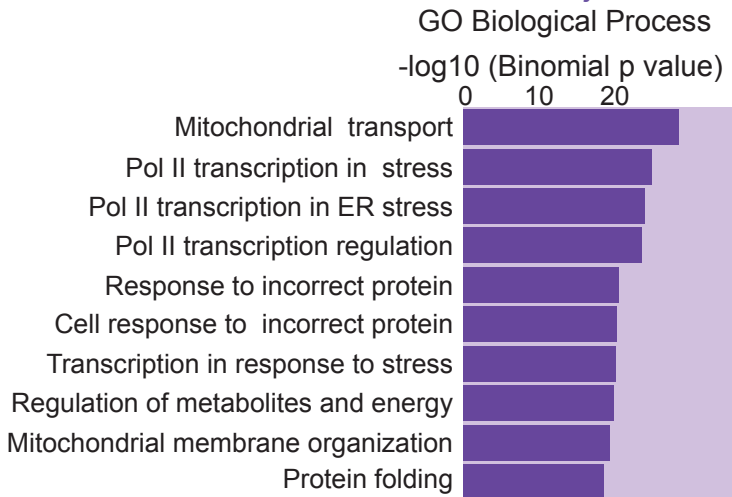

**D**  
Peaks common to injured  
and uninjured fibers

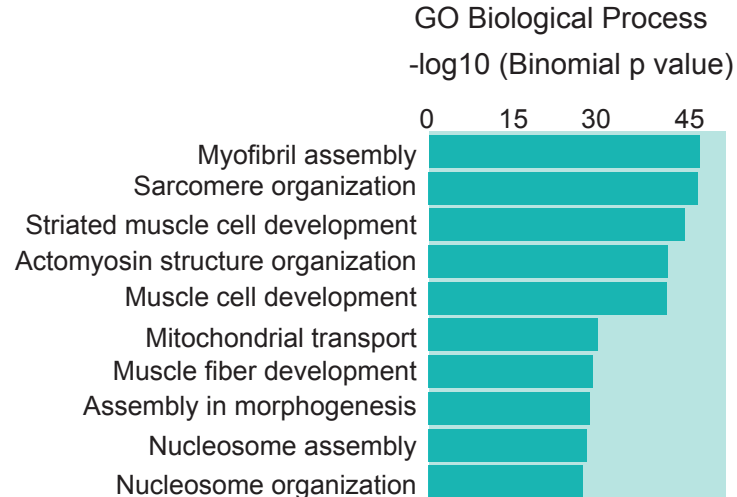

**E**  
Peaks unique to injured fibers  
compared to uninjured fibers

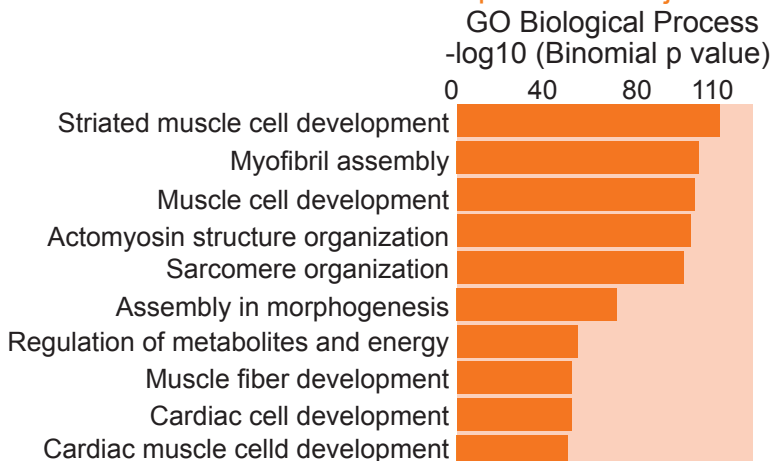

**F**  
Peaks unique to uninjured fibers  
compared to injured fibers

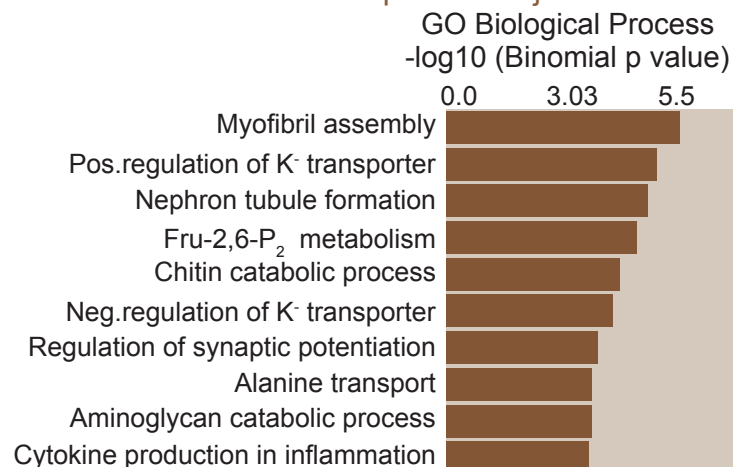

Supplement: supp [file elife-72792-supp-v1.zip › elife_poa_e72792_Figure_4_figure_supplement_1.pdf]
