# Supplementary material for: Application of ATAC-Seq for genome-wide analysis of the chromatin state at single myofiber resolution
Source: eLife journal article supplement (doi:10.7554/elife.72792), 2022-02-21
Supplement: supp [file elife-72792-supp-v1.zip › elife_poa_e72792_Figure_4_figure_supplement_2.pdf]

Figure 4 - Figure Supplement 2

A

Top motifs enriched in peaks common to Injured and Uninjured Myofibers overlapping the promoters

| Motif | Name  | p- value         |
|-------|-------|------------------|
|       | Sp1   | e <sup>-91</sup> |
|       | GFY   | e <sup>-62</sup> |
|       | Elk   | e <sup>-61</sup> |
|       | Mef2a | e <sup>-60</sup> |
|       | ELF   | e <sup>-56</sup> |
|       | ETS   | e <sup>-54</sup> |
|       | NRF   | e <sup>-46</sup> |
|       | CRE   | e <sup>-30</sup> |
|       | YY1   | e <sup>-29</sup> |
|       | NFY   | e <sup>-26</sup> |

B

Top motifs enriched in peaks unique to Injured myofibers overlapping the promoters

| Motif | Name   | p- value           |
|-------|--------|--------------------|
|       | MafA   | e <sup>-1561</sup> |
|       | JUN    | e <sup>-1513</sup> |
|       | Stat 3 | e <sup>-1330</sup> |
|       | Atf3   | e <sup>-1293</sup> |
|       | BATF   | e <sup>-1247</sup> |
|       | Bcl6   | e <sup>-1044</sup> |
|       | Fra1   | e <sup>-1024</sup> |
|       | Fosl2  | e <sup>-998</sup>  |
|       | Cdx2   | e <sup>-915</sup>  |
|       | Sp1    | e <sup>-877</sup>  |
