# Supplementary material for: Application of ATAC-Seq for genome-wide analysis of the chromatin state at single myofiber resolution
Source: eLife journal article supplement (doi:10.7554/elife.72792), 2022-02-21
Supplement: supp [file elife_poa_e72792_Figure_6_figure_supplement_5.pdf › elife_poa_e72792_Figure_6_figure_supplement_5.pdf]

Figure 6 - Figure Supplement 5

| A                                                                                     |       |                   | B                                                                                    |        |                   |
|---------------------------------------------------------------------------------------|-------|-------------------|--------------------------------------------------------------------------------------|--------|-------------------|
| Top motifs enriched in peaks common to MDX and WT Myofibers overlapping the promoters |       |                   | Top motifs enriched in peaks unique to MDX myofibers overlapping the promoters       |        |                   |
| Motif                                                                                 | Name  | p- value          | Motif                                                                                | Name   | p- value          |
|      | CTCF  | e <sup>-149</sup> |    | Sox 10 | e <sup>-303</sup> |
|      | BORIS | e <sup>-82</sup>  |    | Nkx3   | e <sup>-227</sup> |
|      | Mef2a | e <sup>-81</sup>  |    | Olig 2 | e <sup>-202</sup> |
|      | Sp1   | e <sup>-59</sup>  |    | PR     | e <sup>-199</sup> |
|      | GFY   | e <sup>-43</sup>  |    | Foxo 1 | e <sup>-191</sup> |
|      | ETS   | e <sup>-39</sup>  |    | Meis 1 | e <sup>-189</sup> |
|      | NRF1  | e <sup>-39</sup>  |    | Rbpj1  | e <sup>-174</sup> |
|     | JUN   | e <sup>-37</sup>  |   | Eomes  | e <sup>-169</sup> |
|    | Six1  | e <sup>-34</sup>  |  | Znf263 | e <sup>-168</sup> |
|    | Bach2 | e <sup>-27</sup>  |  | Isl1   | e <sup>-165</sup> |
| C                                                                                     |       |                   |                                                                                      |        |                   |
| Top motifs enriched in peaks unique to WT myofibers overlapping the promoters         |       |                   |                                                                                      |        |                   |
| Motif                                                                                 | Name  | p- value          |                                                                                      |        |                   |
|    | CTCF  | e <sup>-7</sup>   |                                                                                      |        |                   |
