# Supplementary material for: Application of ATAC-Seq for genome-wide analysis of the chromatin state at single myofiber resolution
Source: eLife journal article supplement (doi:10.7554/elife.72792), 2022-02-21

Assay Class: High Sensitivity DNA Assay  
Data Path: C:\...-08-04\BAN300\_High Sensitivity DNA Assay\_2020-08-04\_001.xad

Created: 8/4/2020 11:44:53 AM  
Modified: 8/4/2020 12:26:12 PM

### Electrophoresis File Run Summary

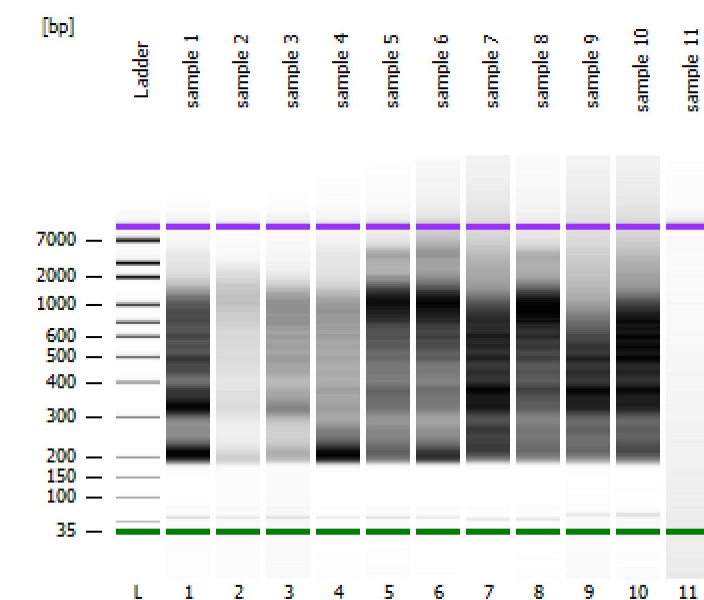

#### Instrument Information:

Instrument Name: BioA  
Serial#: DE72900930  
Firmware: C.01.069  
Type: G2939A

#### Assay Information:

Assay Origin Path: C:\Program Files (x86)\Agilent\2100 bioanalyzer\2100 expert\assays\dsDNA\High Sensitivity DNA.xsy  
Assay Class: High Sensitivity DNA Assay  
Version: 1.0  
Assay Comments: Copyright © 2003-2009 Agilent Technologies

#### Chip Information:

Chip Lot #:  
Reagent Kit Lot #:  
Chip Comments:

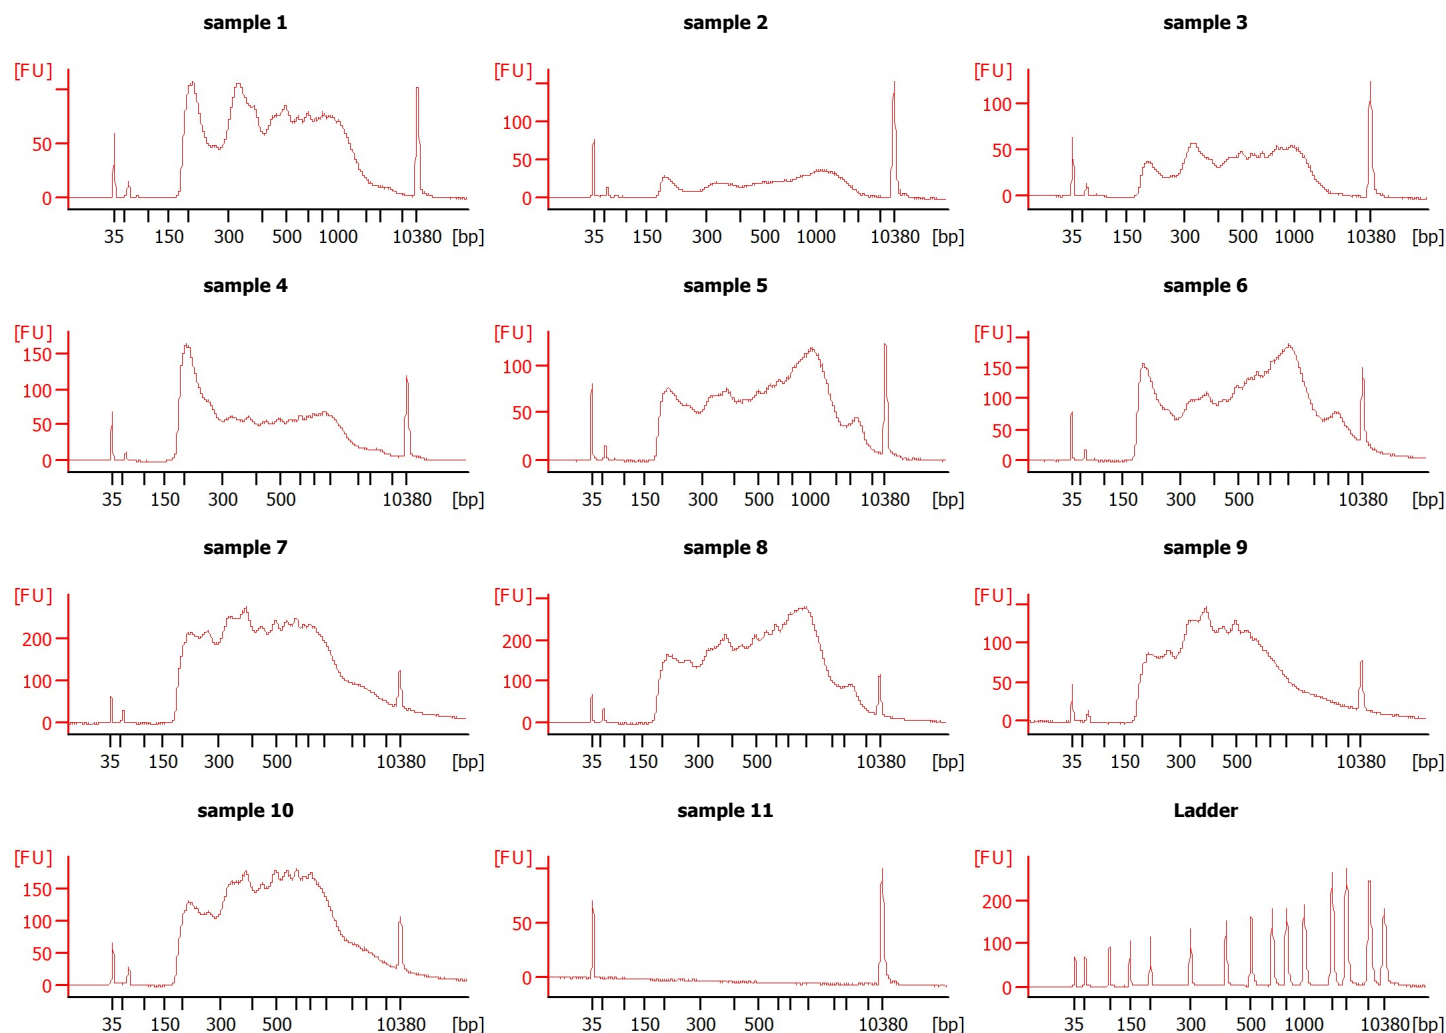

Supplement: supp [file Figure 1 figure supplement 1 source data 2.pdf › Figure 1 figure supplement 1 source data 2.pdf]
