# Supplementary figures and images for: Application of ATAC-Seq for genome-wide analysis of the chromatin state at single myofiber resolution
Source: eLife journal article supplement (doi:10.7554/elife.72792), 2022-02-21

Figure 1- Figure Supplement 1

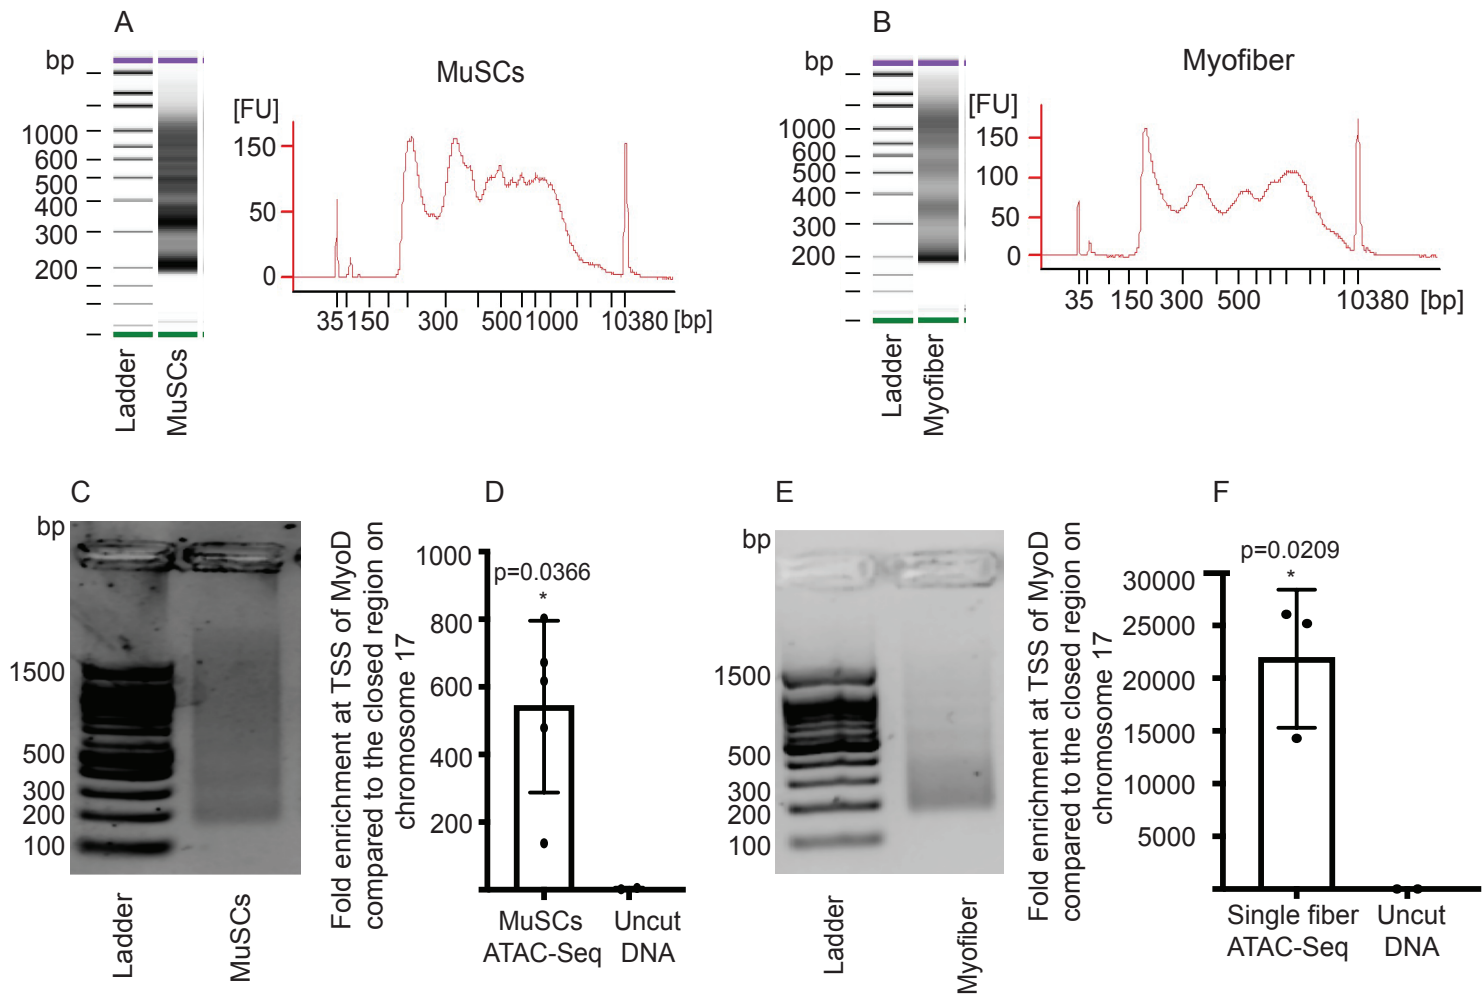

Supplement: supp [file elife-72792-supp-v1.zip › elife_poa_e72792_Figure_1_figure_supplement_1.pdf]

Figure 2- Figure Supplement 1

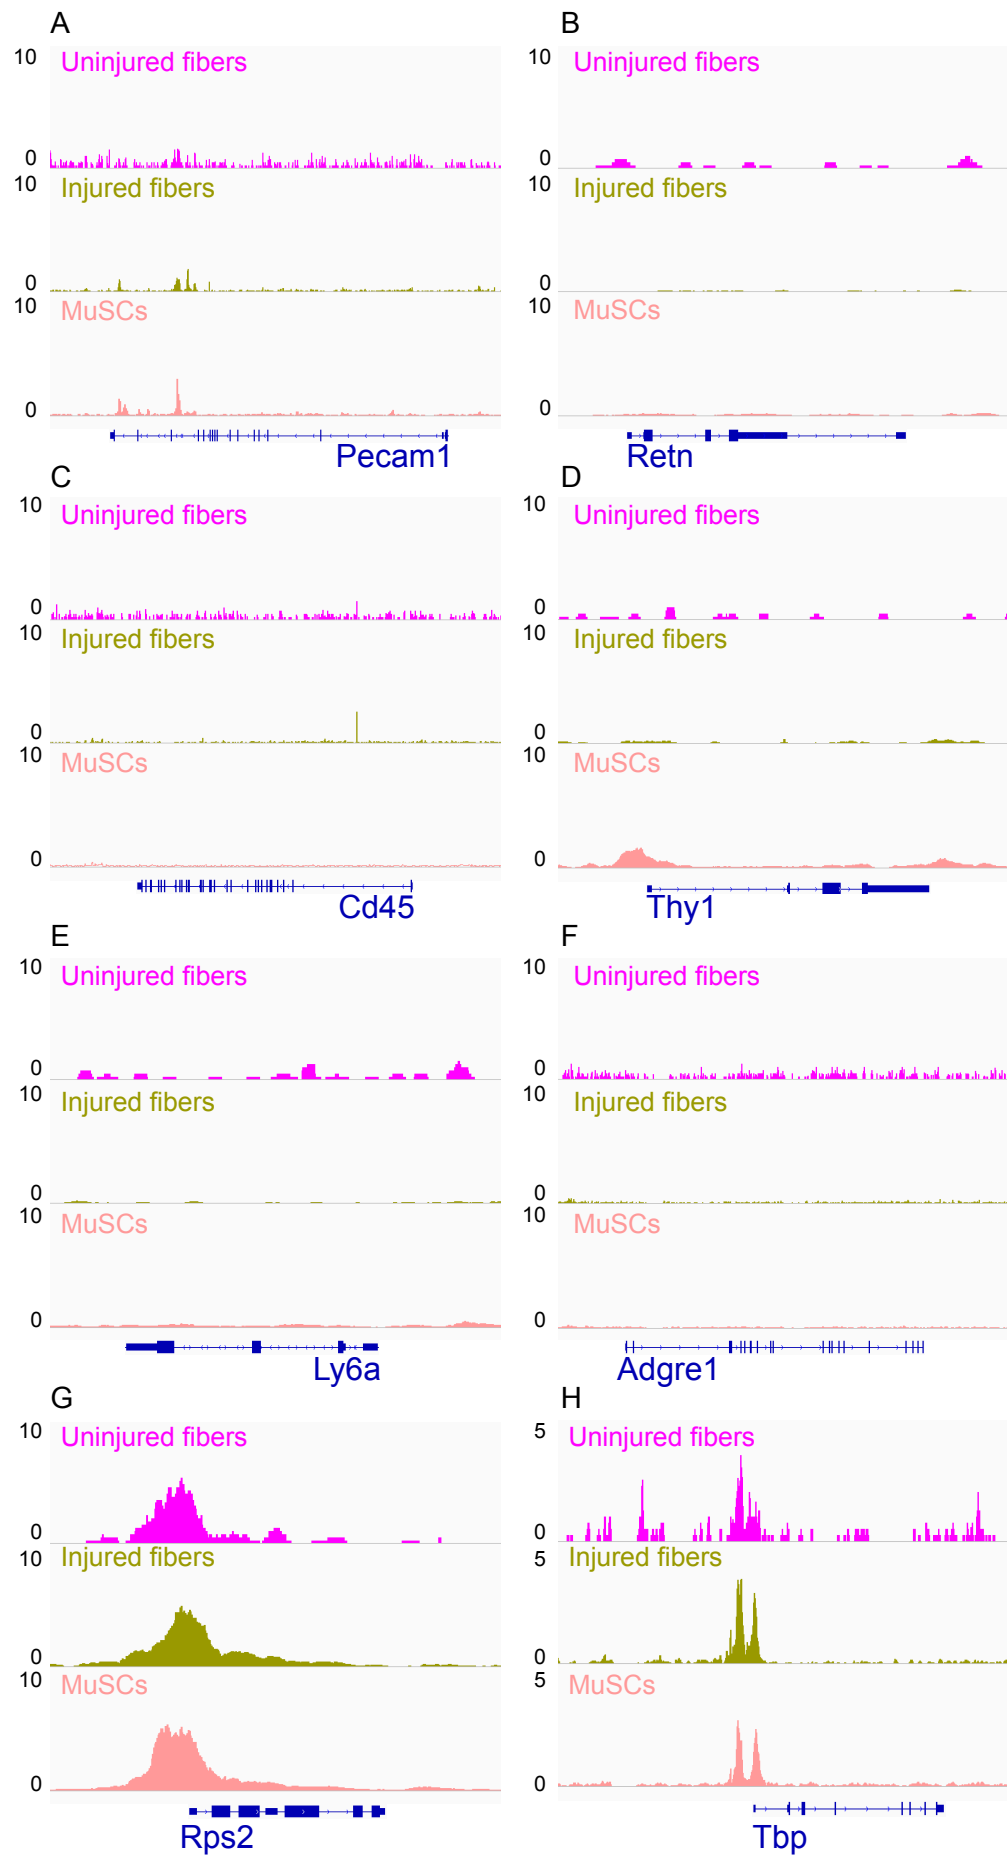

Supplement: supp [file elife-72792-supp-v1.zip › elife_poa_e72792_Figure_2_figure_supplement_1.pdf]

Figure 2- Figure Supplement 2

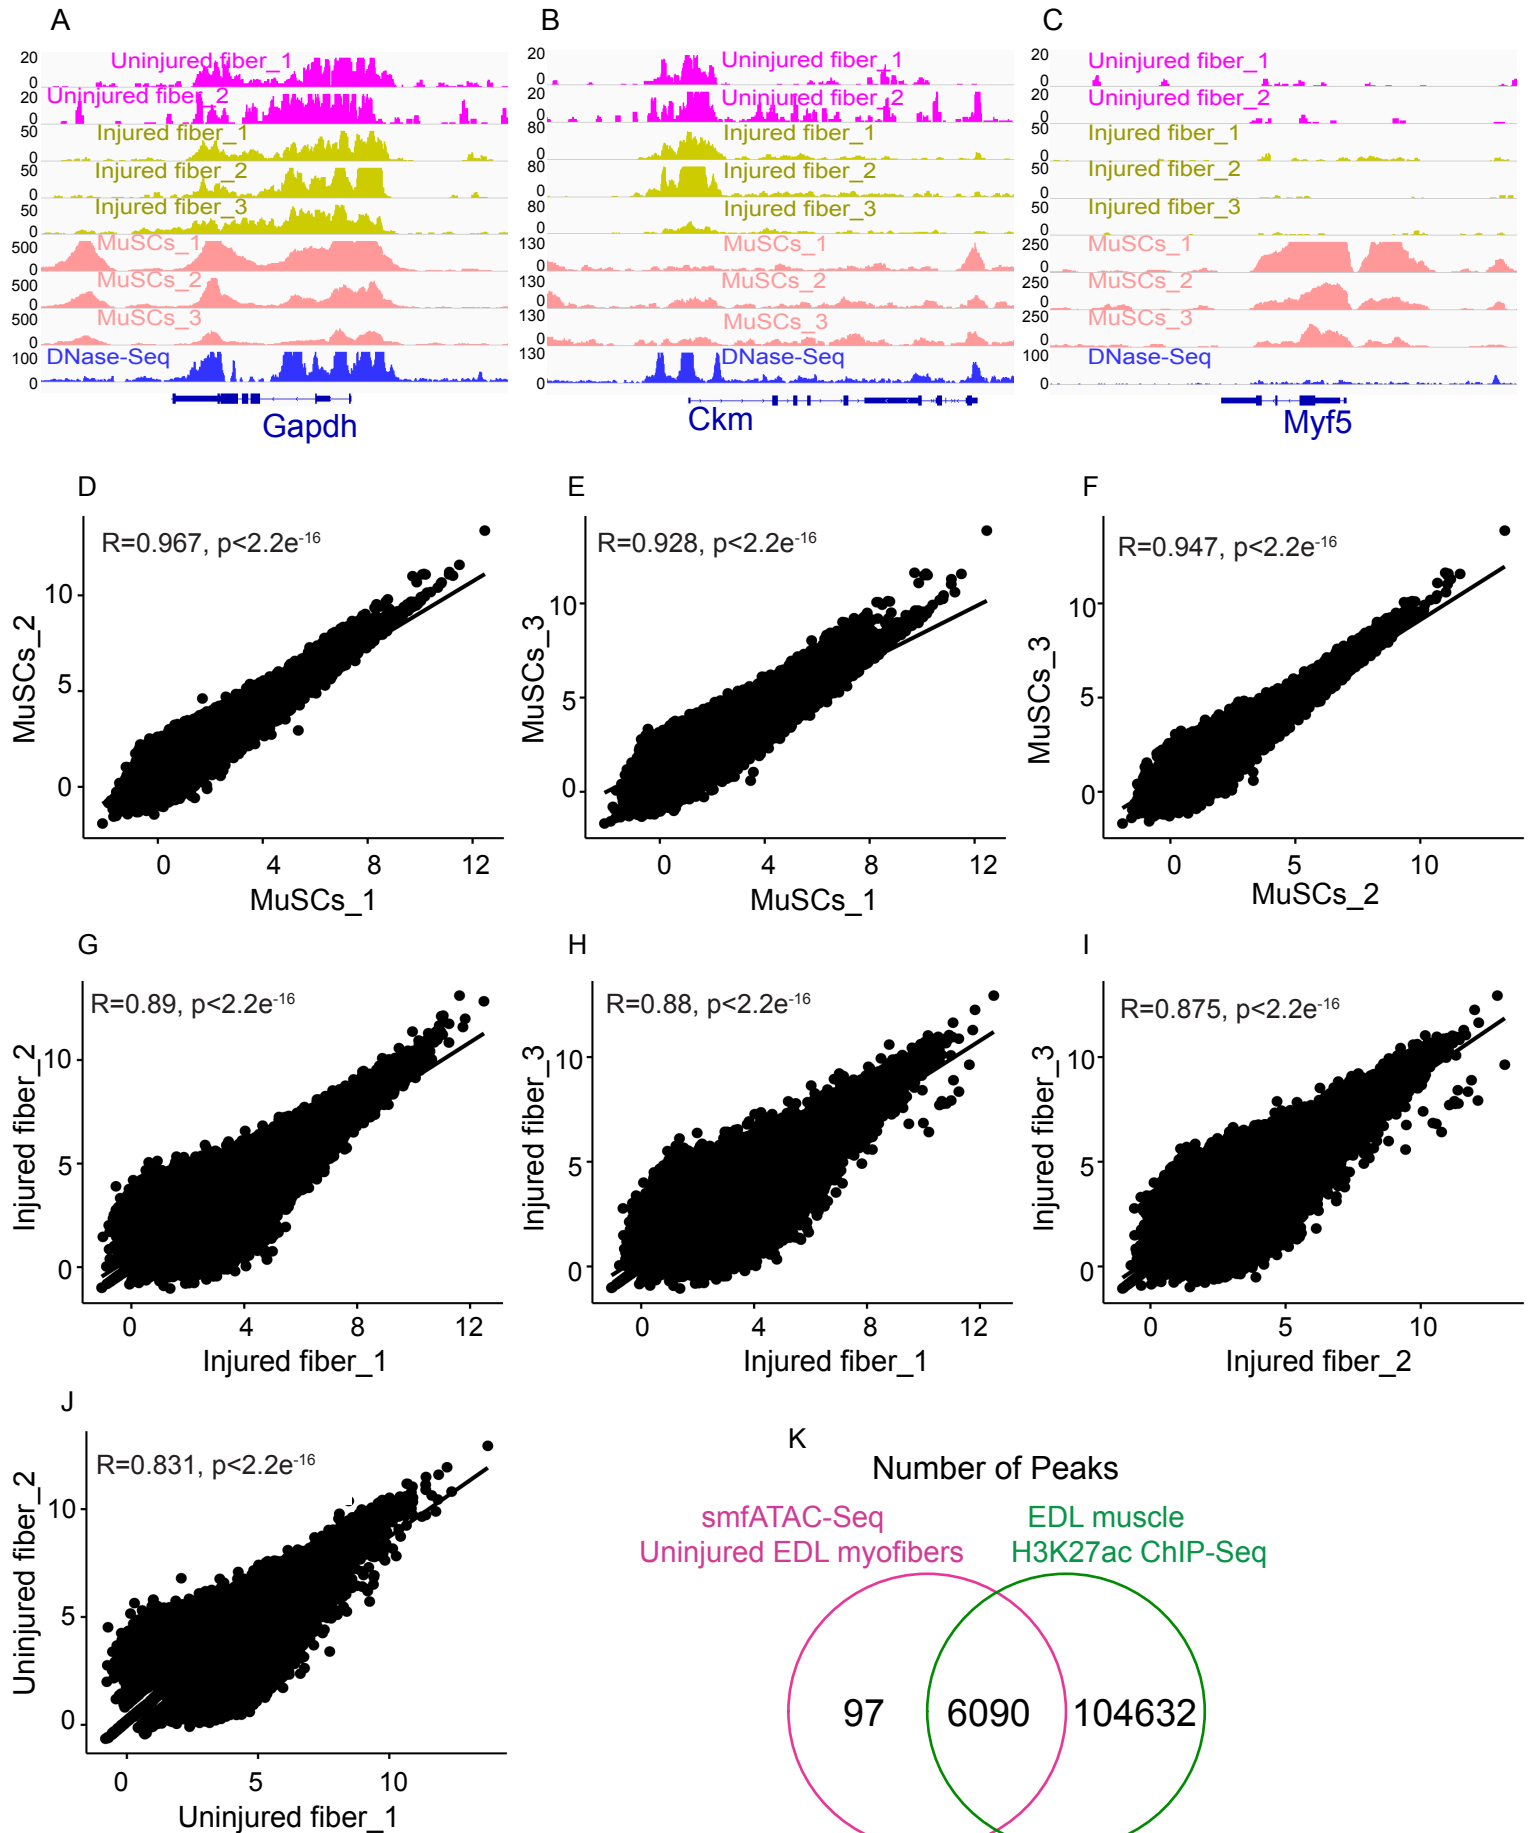

Supplement: supp [file elife-72792-supp-v1.zip › elife_poa_e72792_Figure_2_figure_supplement_2.pdf]

Figure 2- Figure Supplement 3

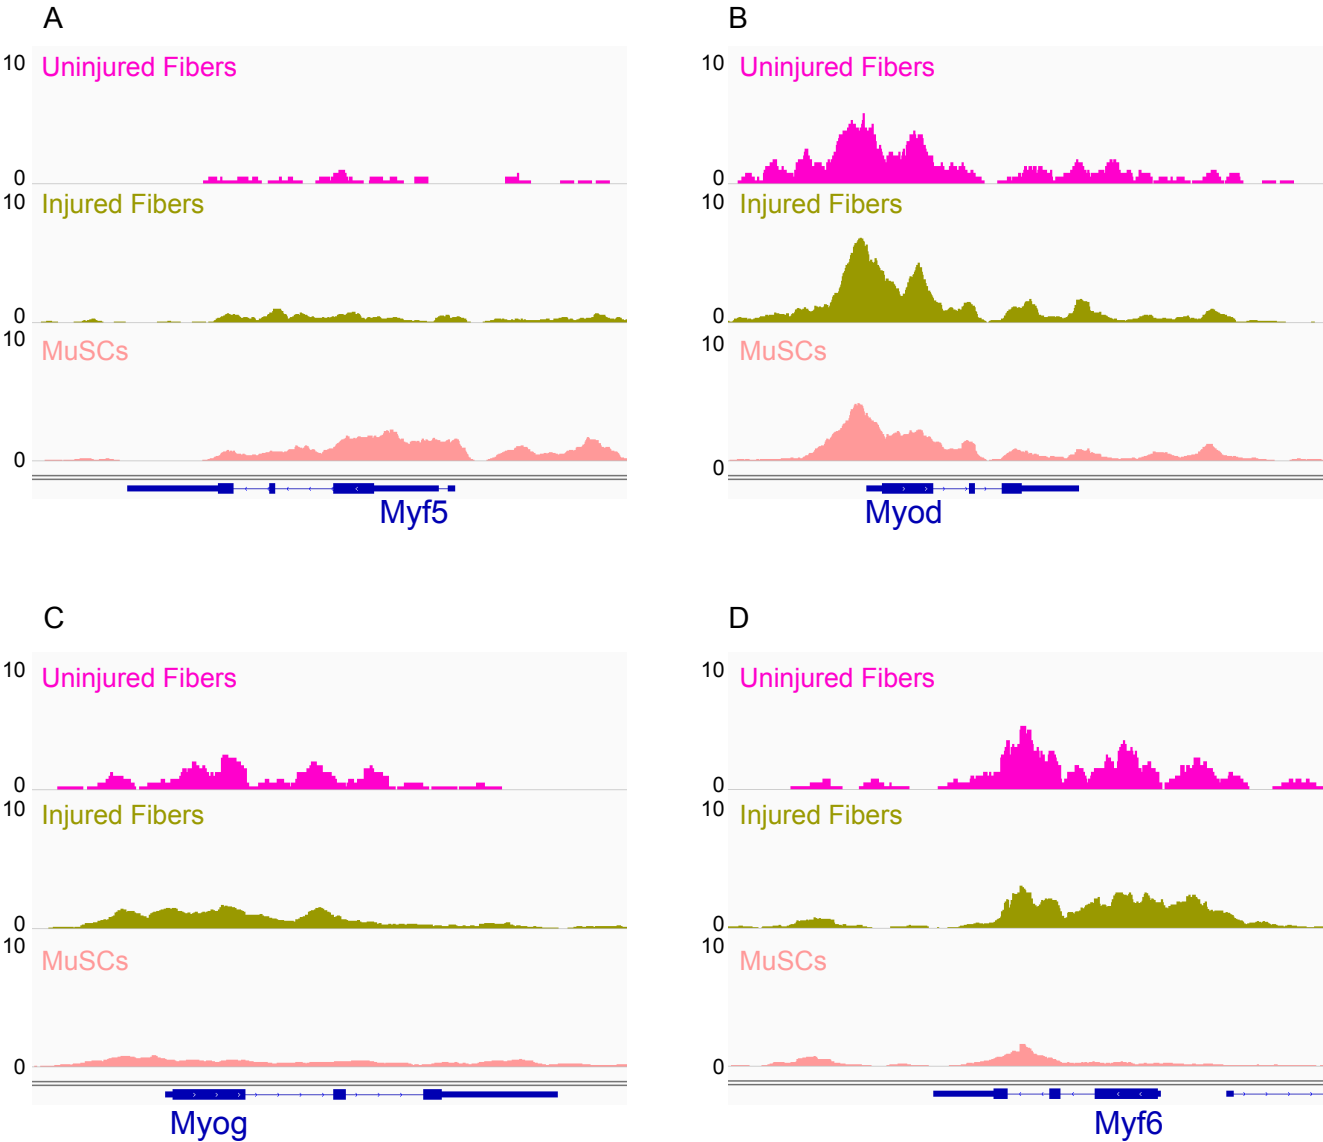

Supplement: supp [file elife-72792-supp-v1.zip › elife_poa_e72792_Figure_2_figure_supplement_3.pdf]

Figure 3 - Figure Supplement 1

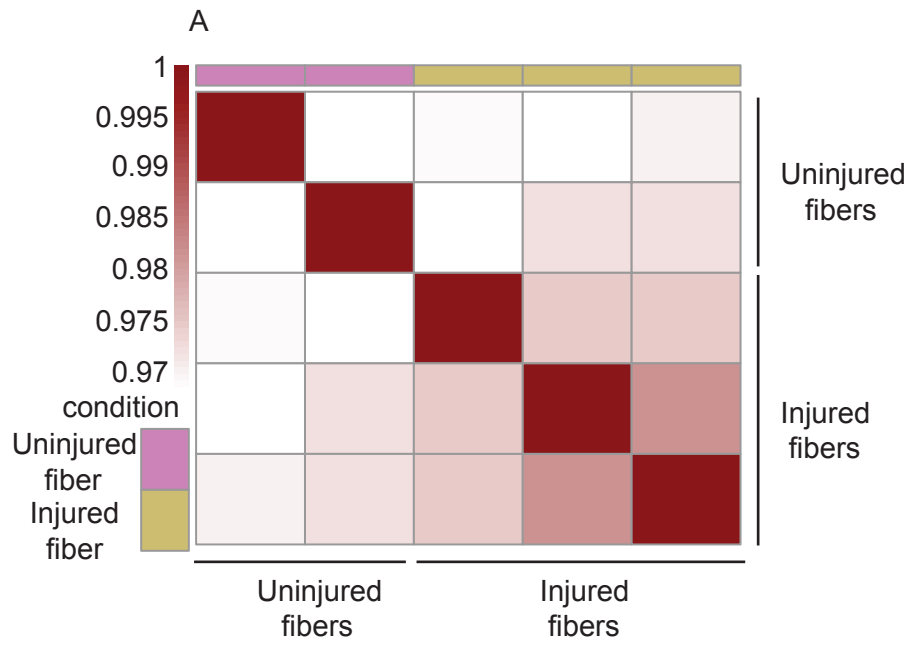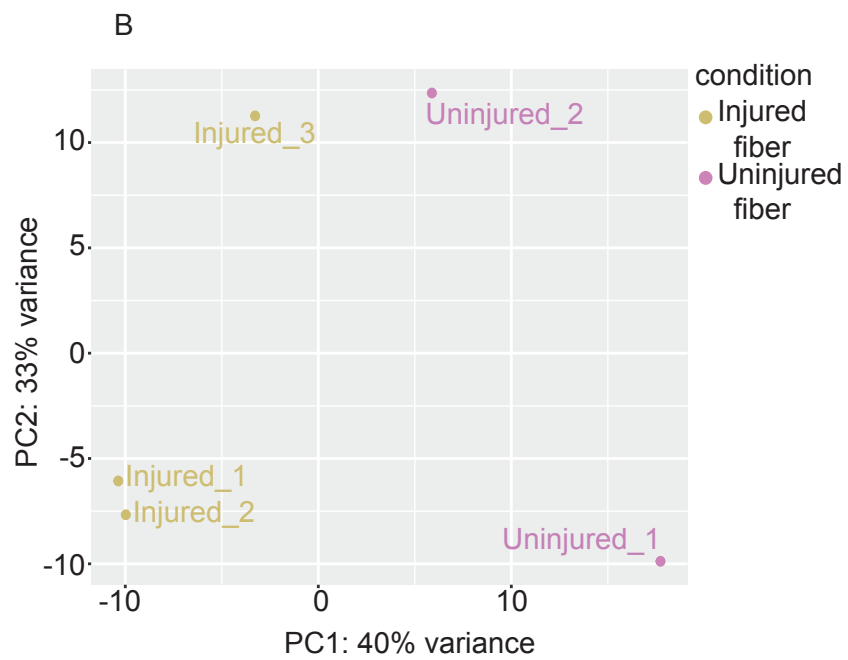

Supplement: supp [file elife-72792-supp-v1.zip › elife_poa_e72792_Figure_3_figure_supplement_1.pdf]

Figure 3- Figure Supplement 2

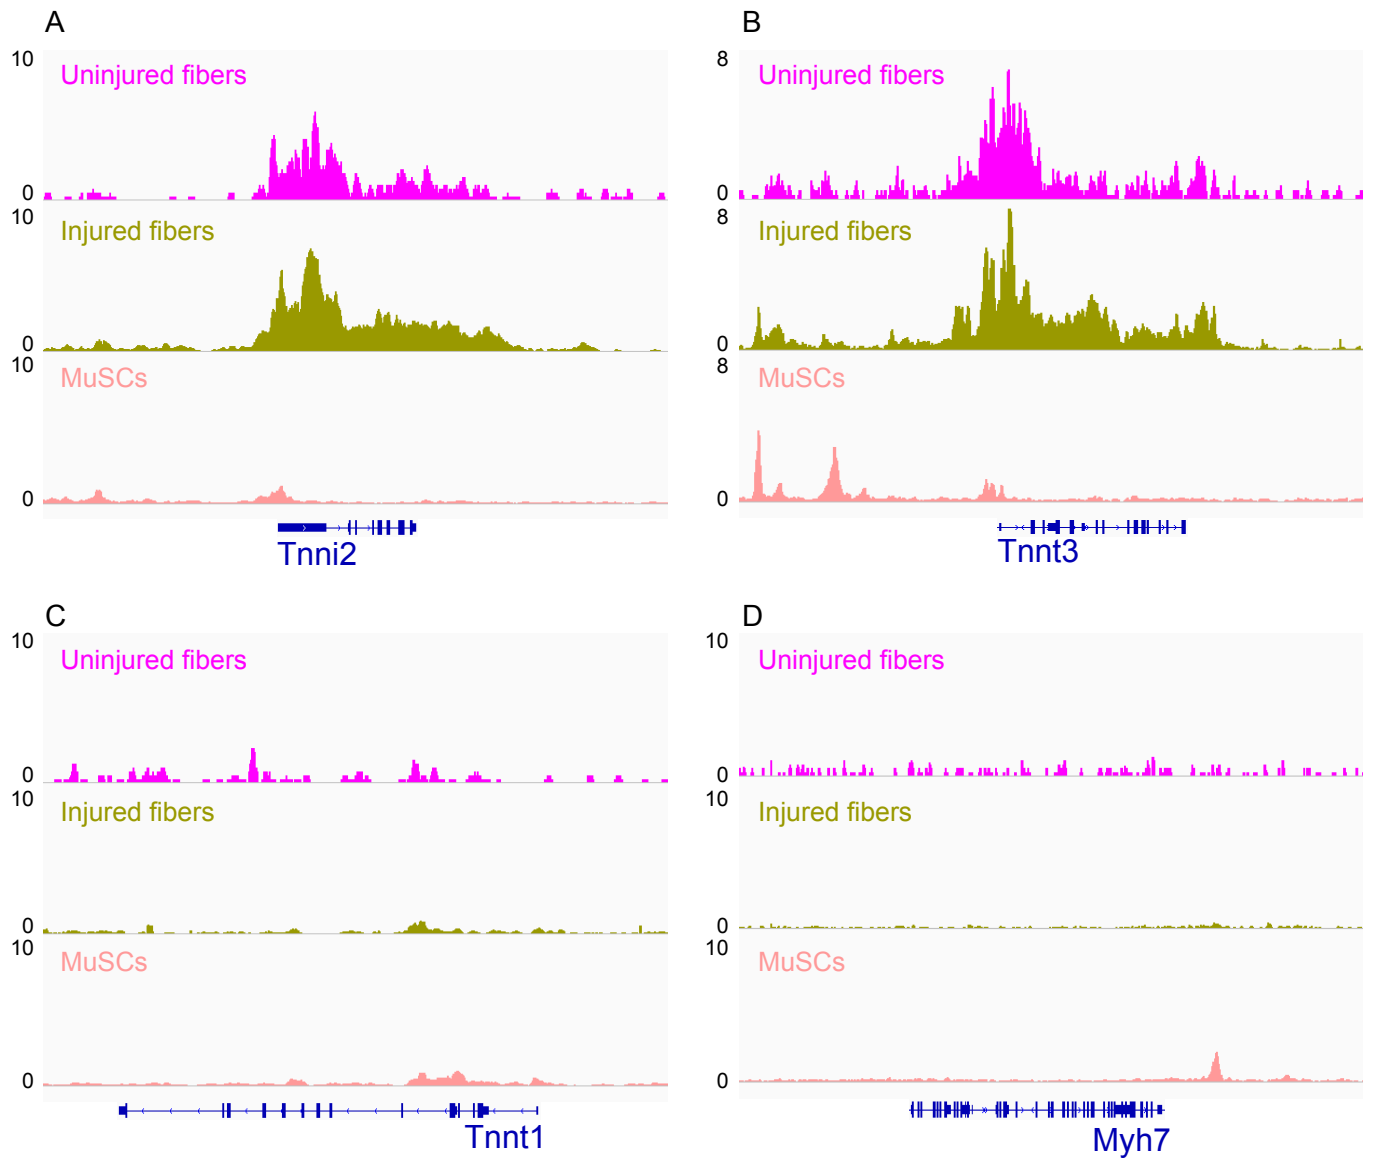

Supplement: supp [file elife-72792-supp-v1.zip › elife_poa_e72792_Figure_3_figure_supplement_2.pdf]

Figure 3 - Figure Supplement 3

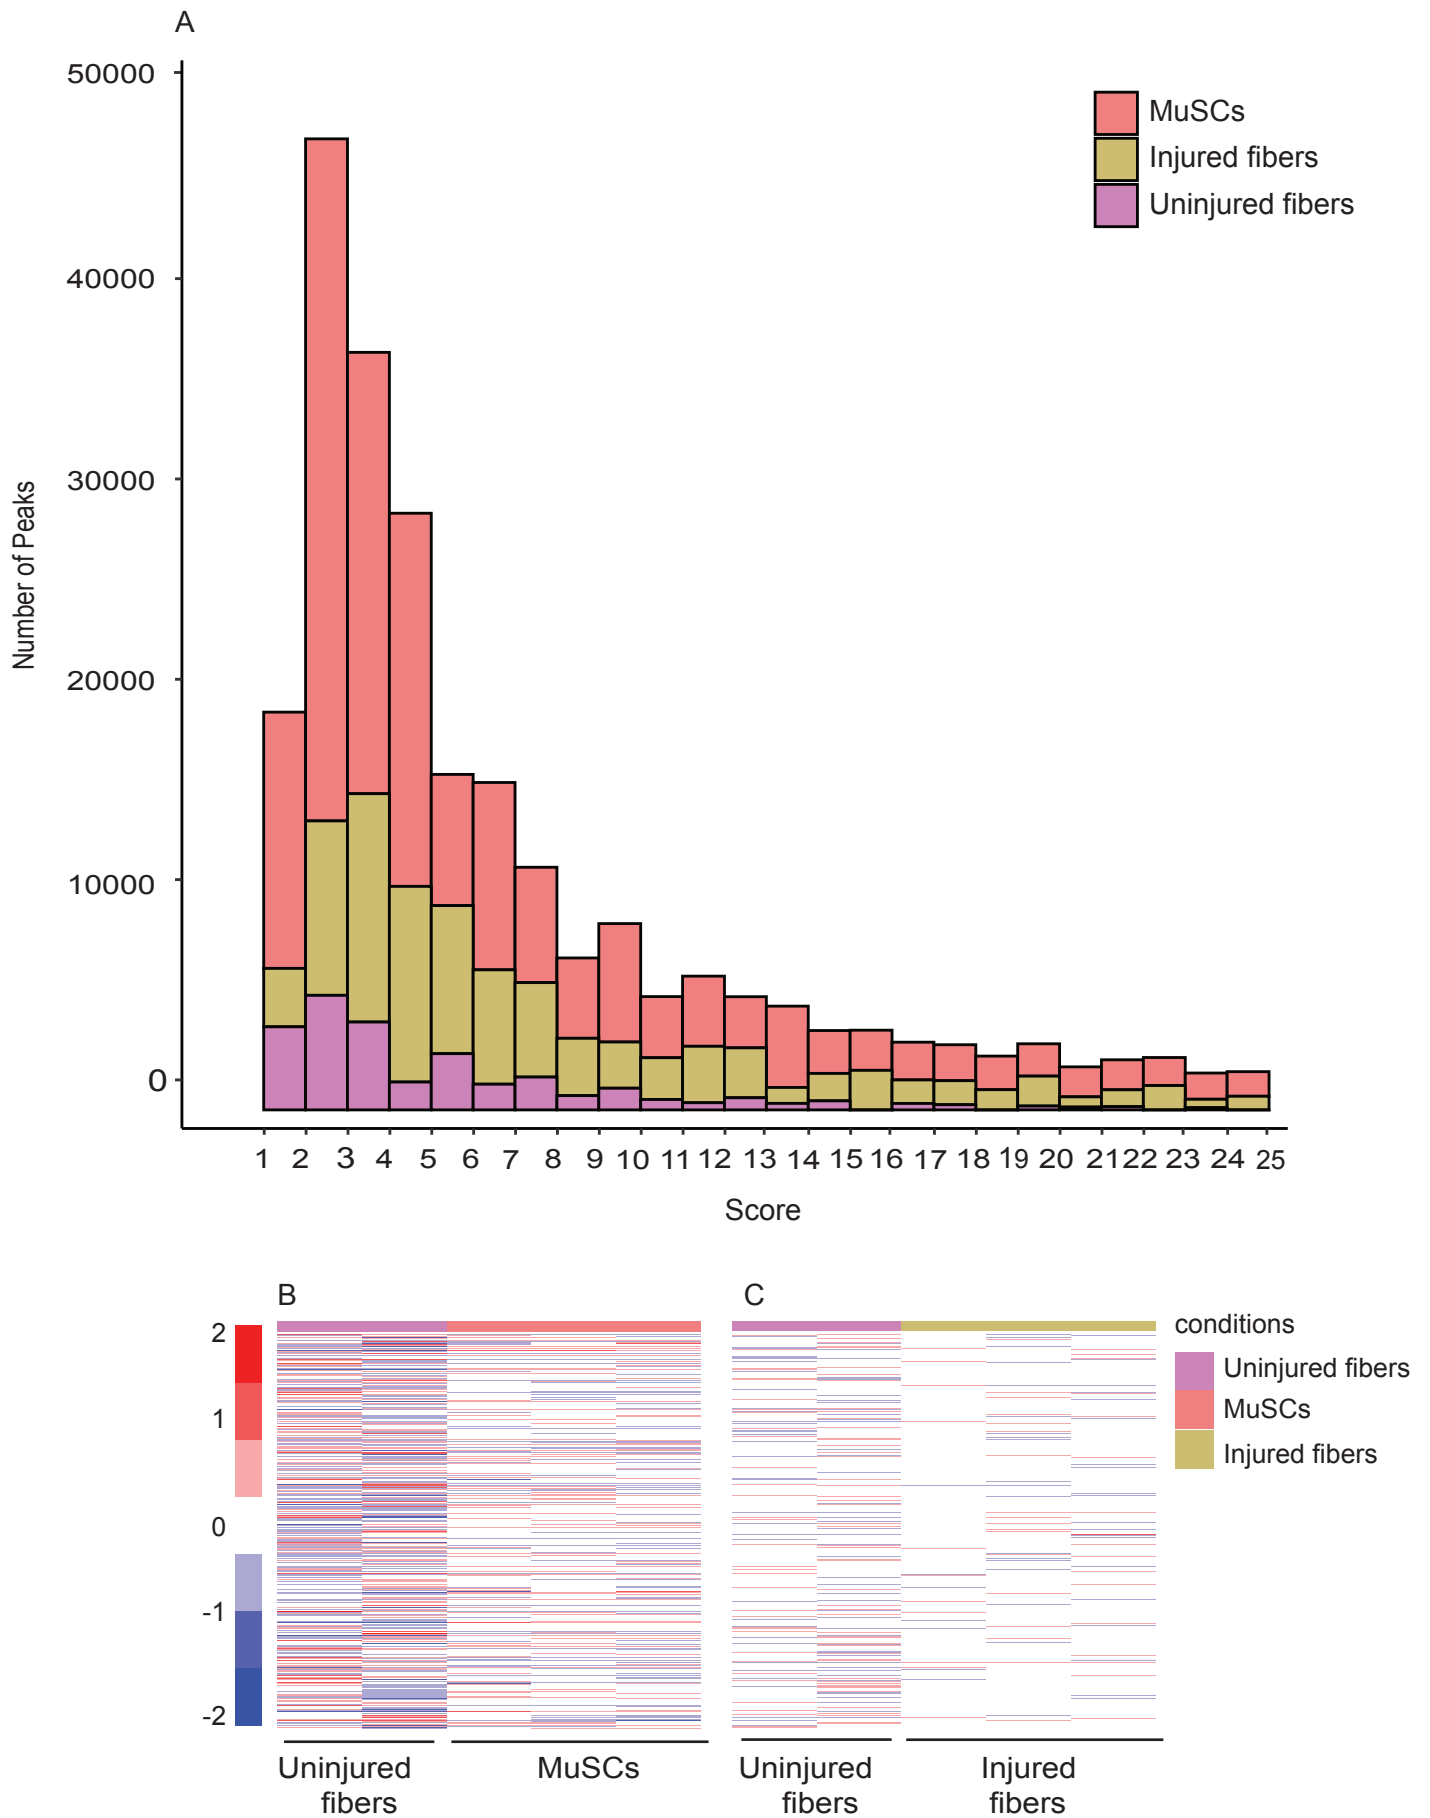

Supplement: supp [file elife-72792-supp-v1.zip › elife_poa_e72792_Figure_3_figure_supplement_3.pdf]

Figure 5-Figure Supplement 1

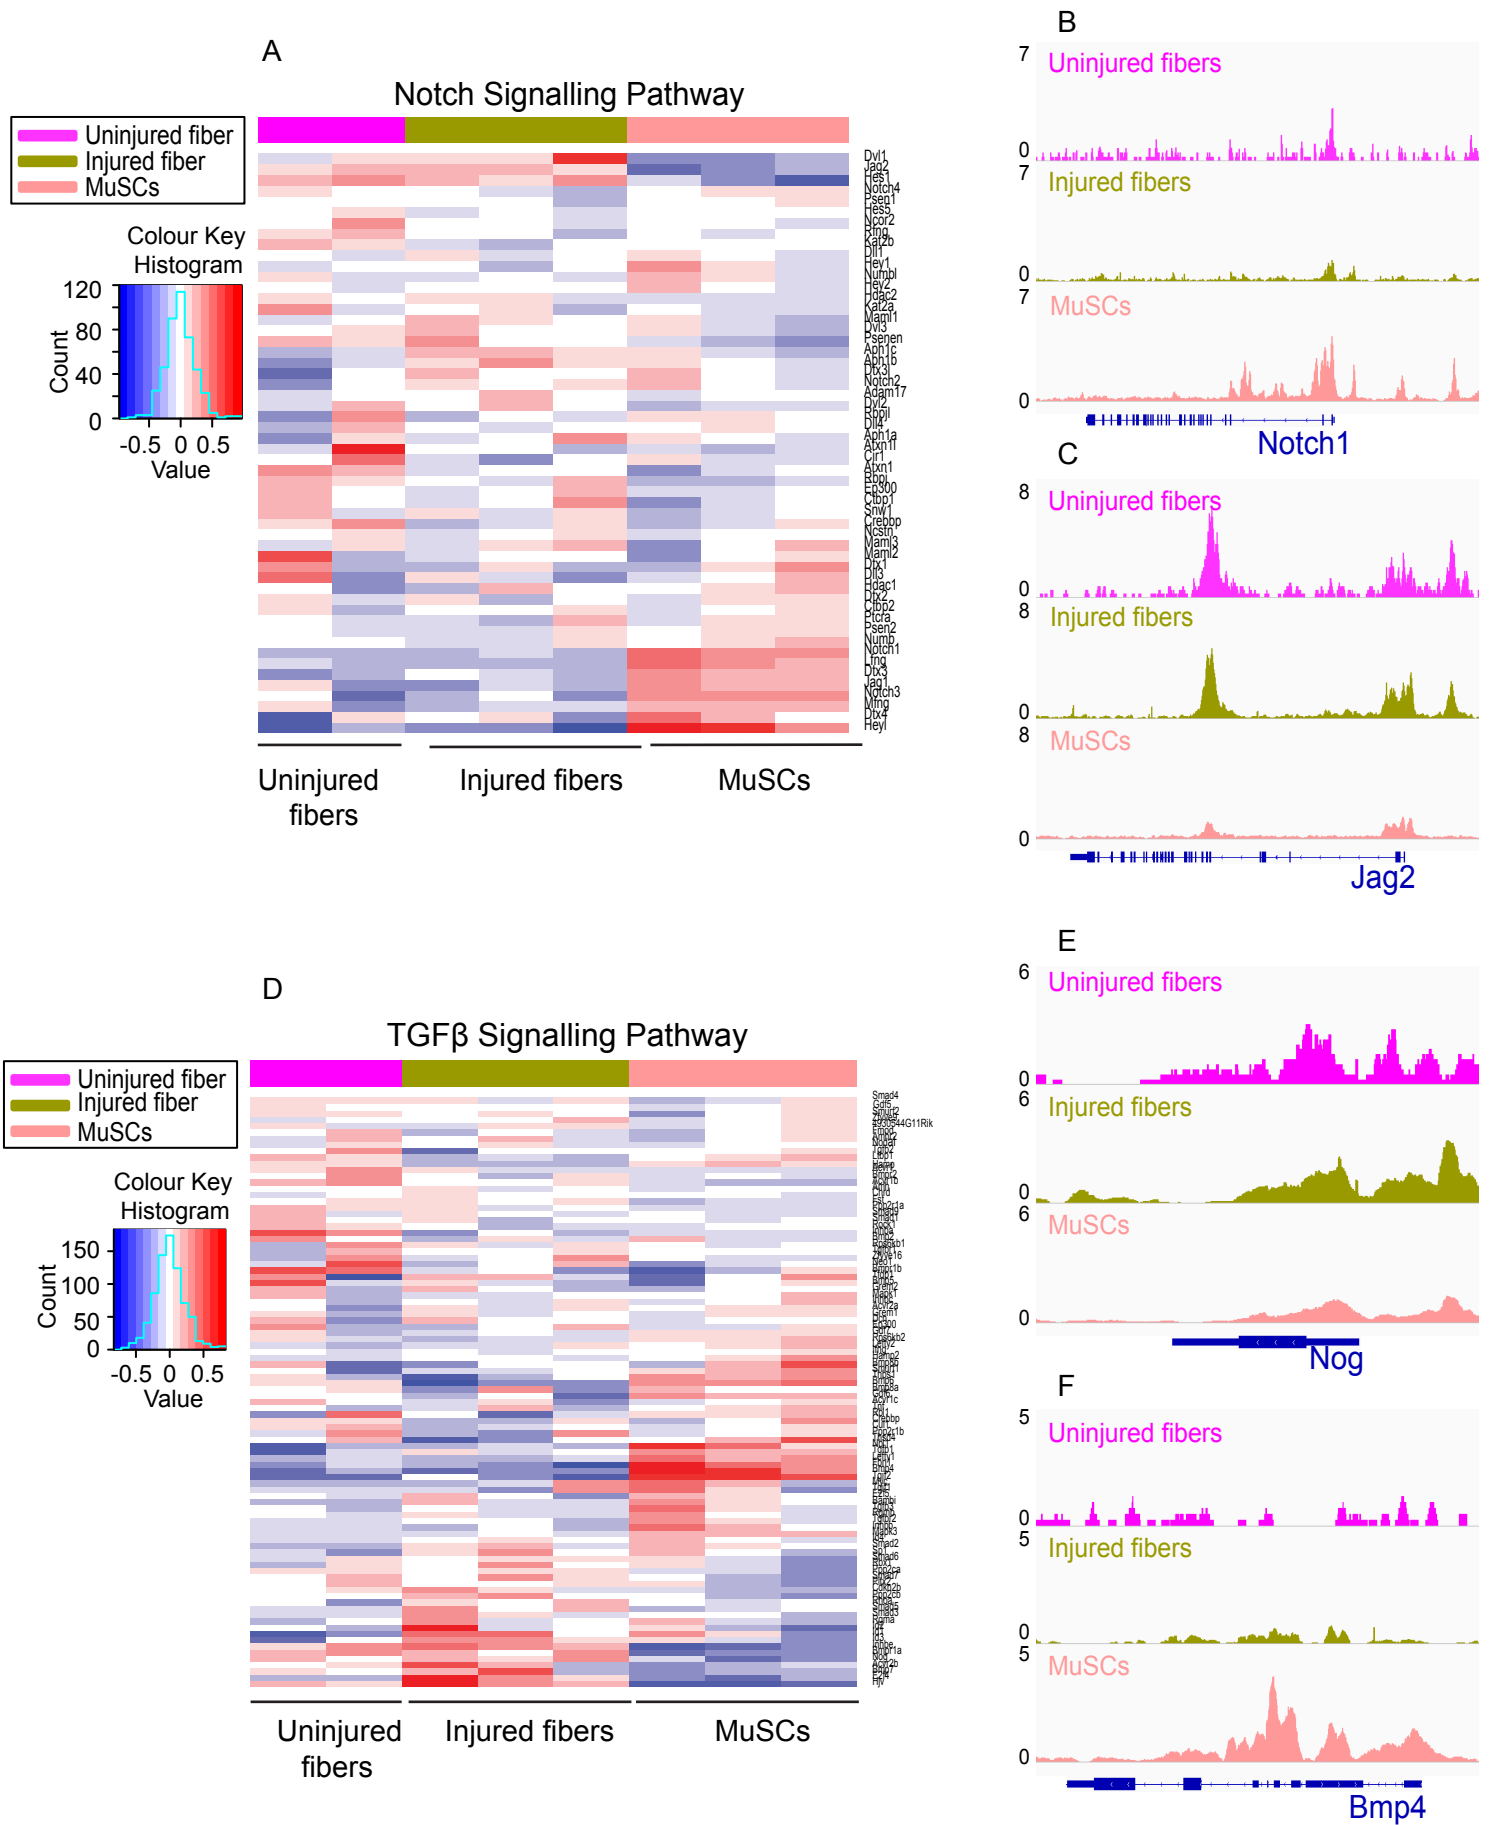

Supplement: supp [file elife-72792-supp-v1.zip › elife_poa_e72792_Figure_5_figure_supplement_1.pdf]

Figure 6- Figure Supplement 1

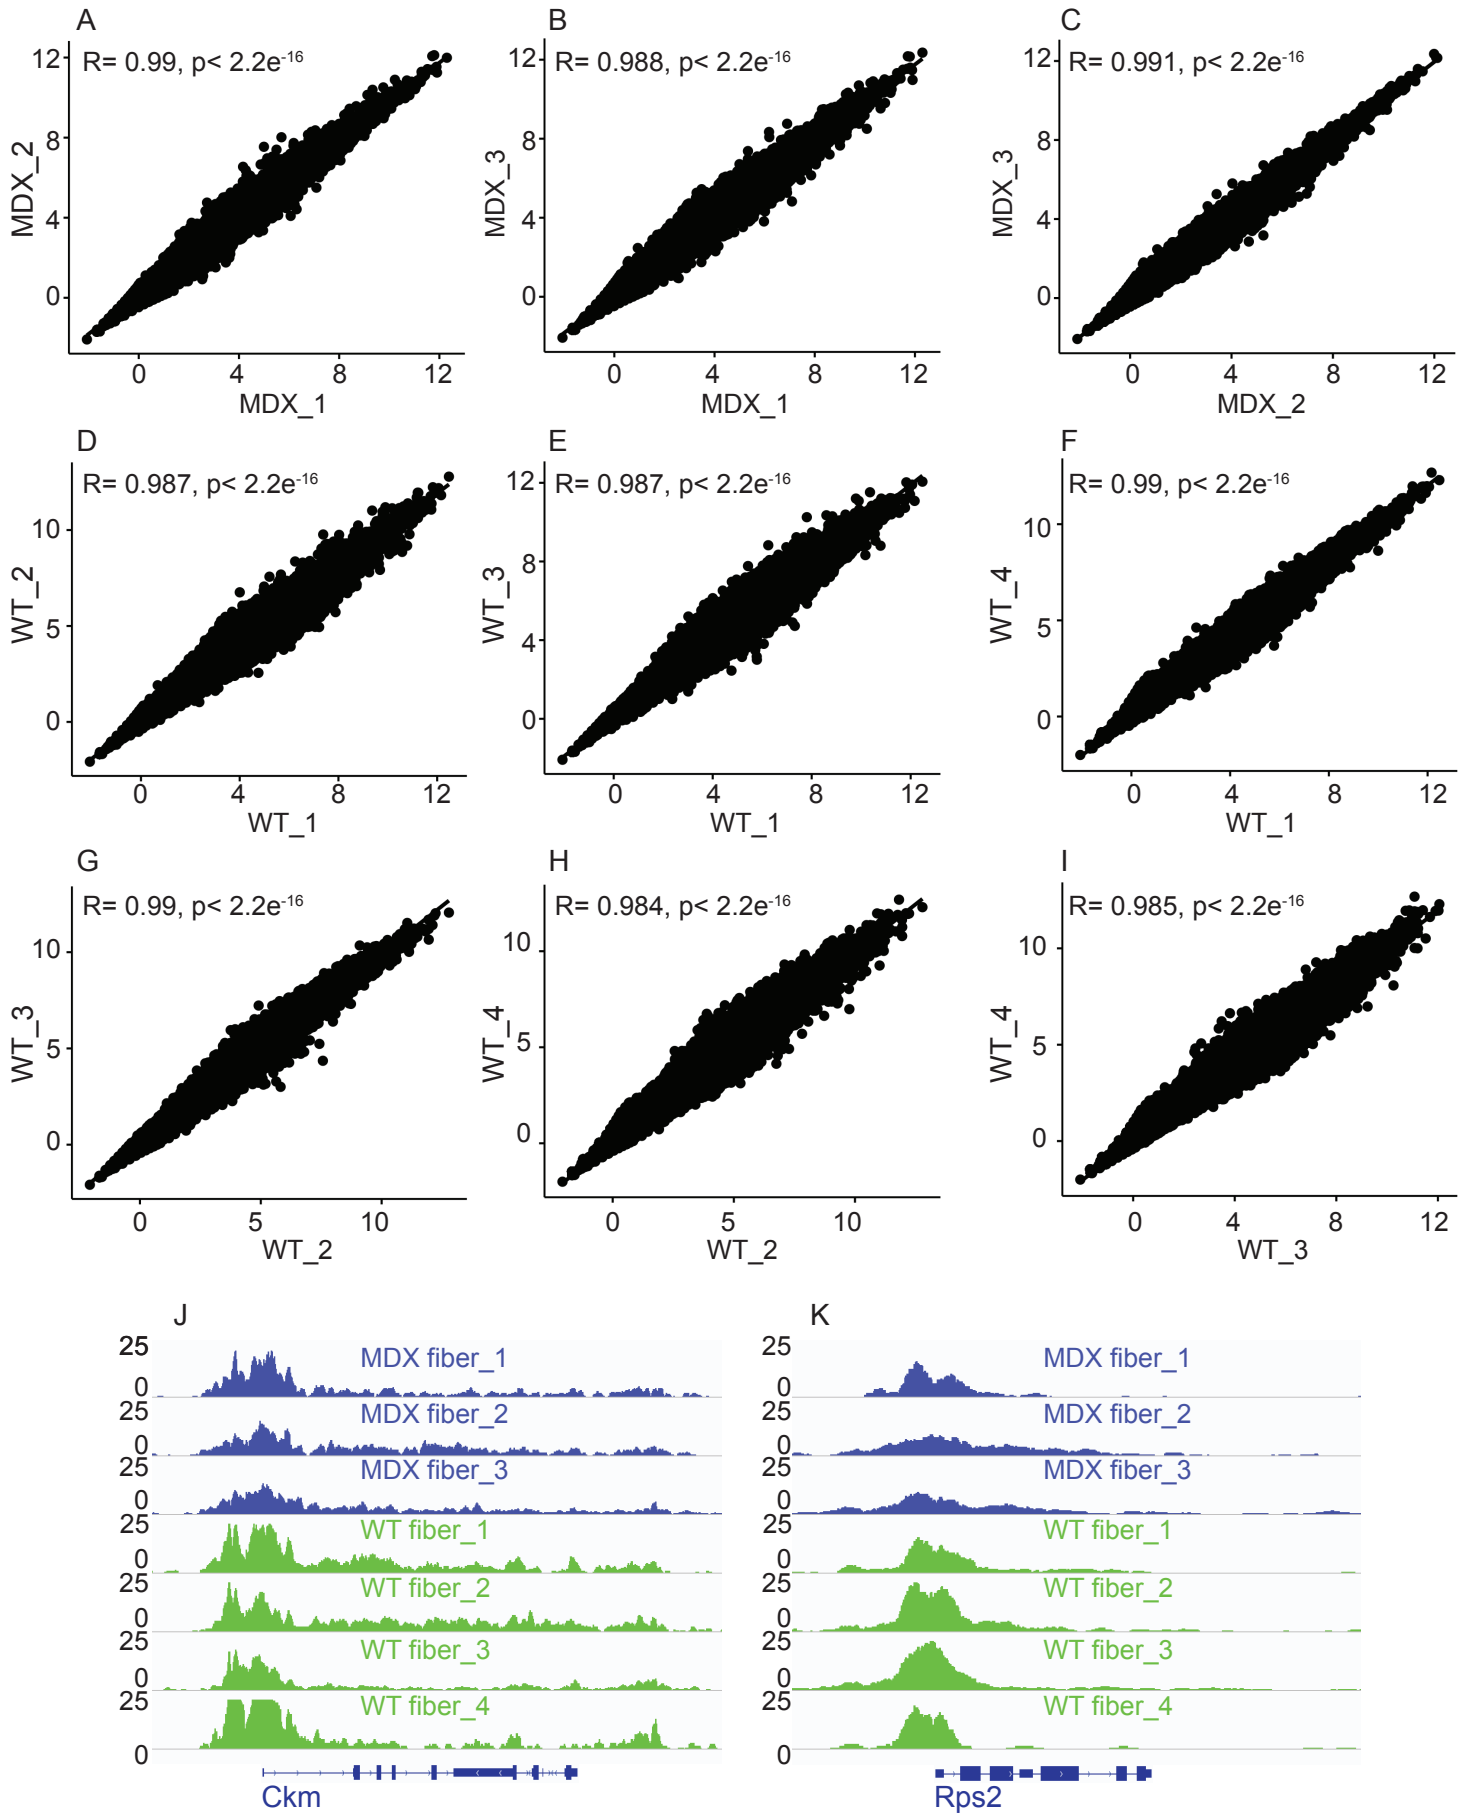

Supplement: supp [file elife-72792-supp-v1.zip › elife_poa_e72792_Figure_6_figure_supplement_1.pdf]

Figure 6- Figure Supplement 2

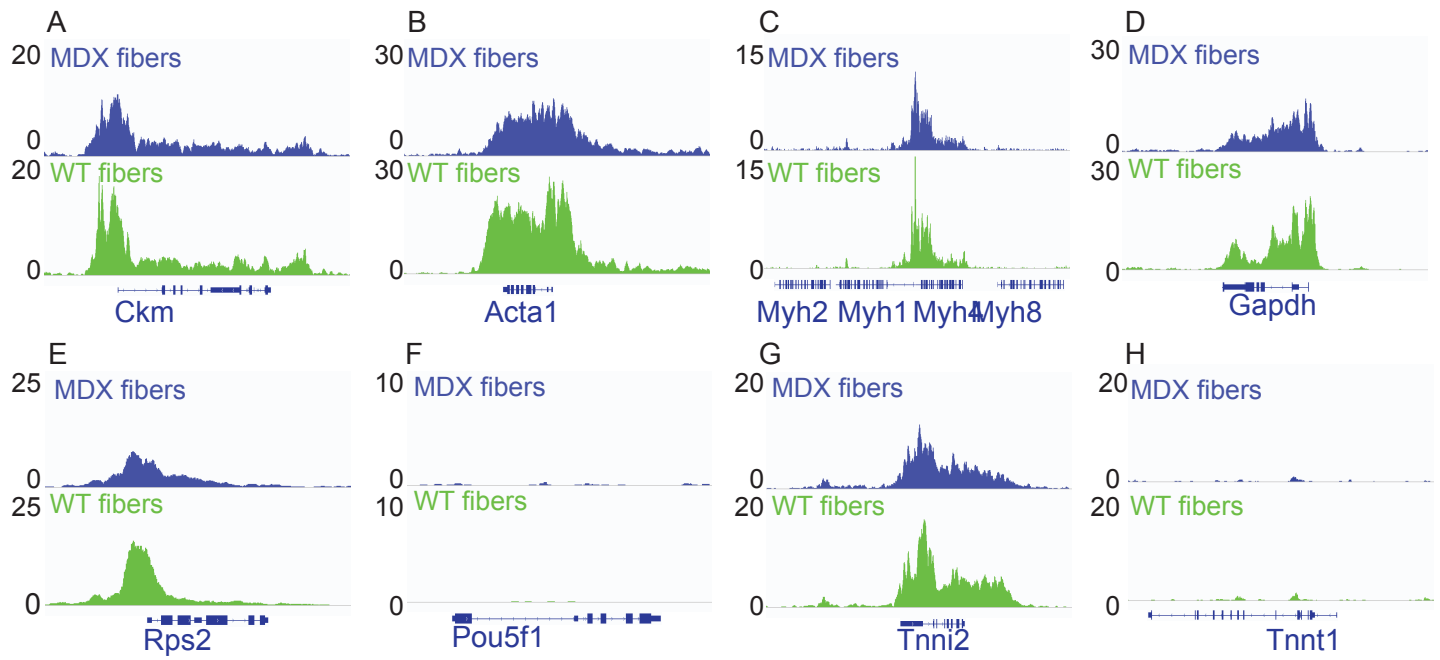

Non-myogenic genes

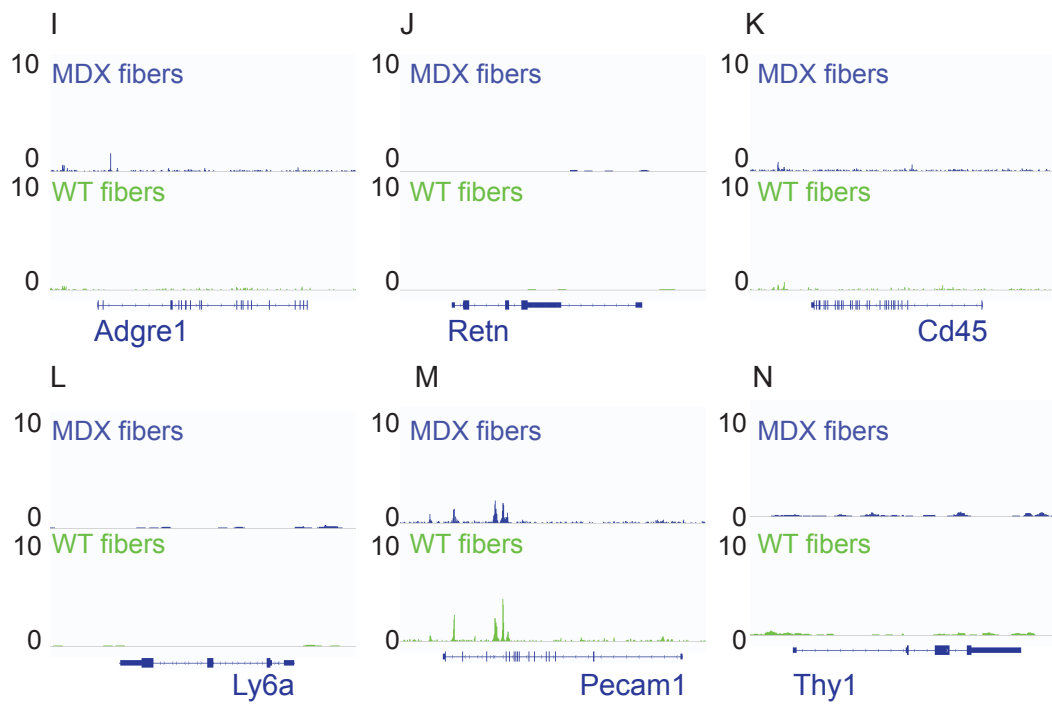

Supplement: supp [file elife-72792-supp-v1.zip › elife_poa_e72792_Figure_6_figure_supplement_2.pdf]

Figure 6- Figure Supplement 3

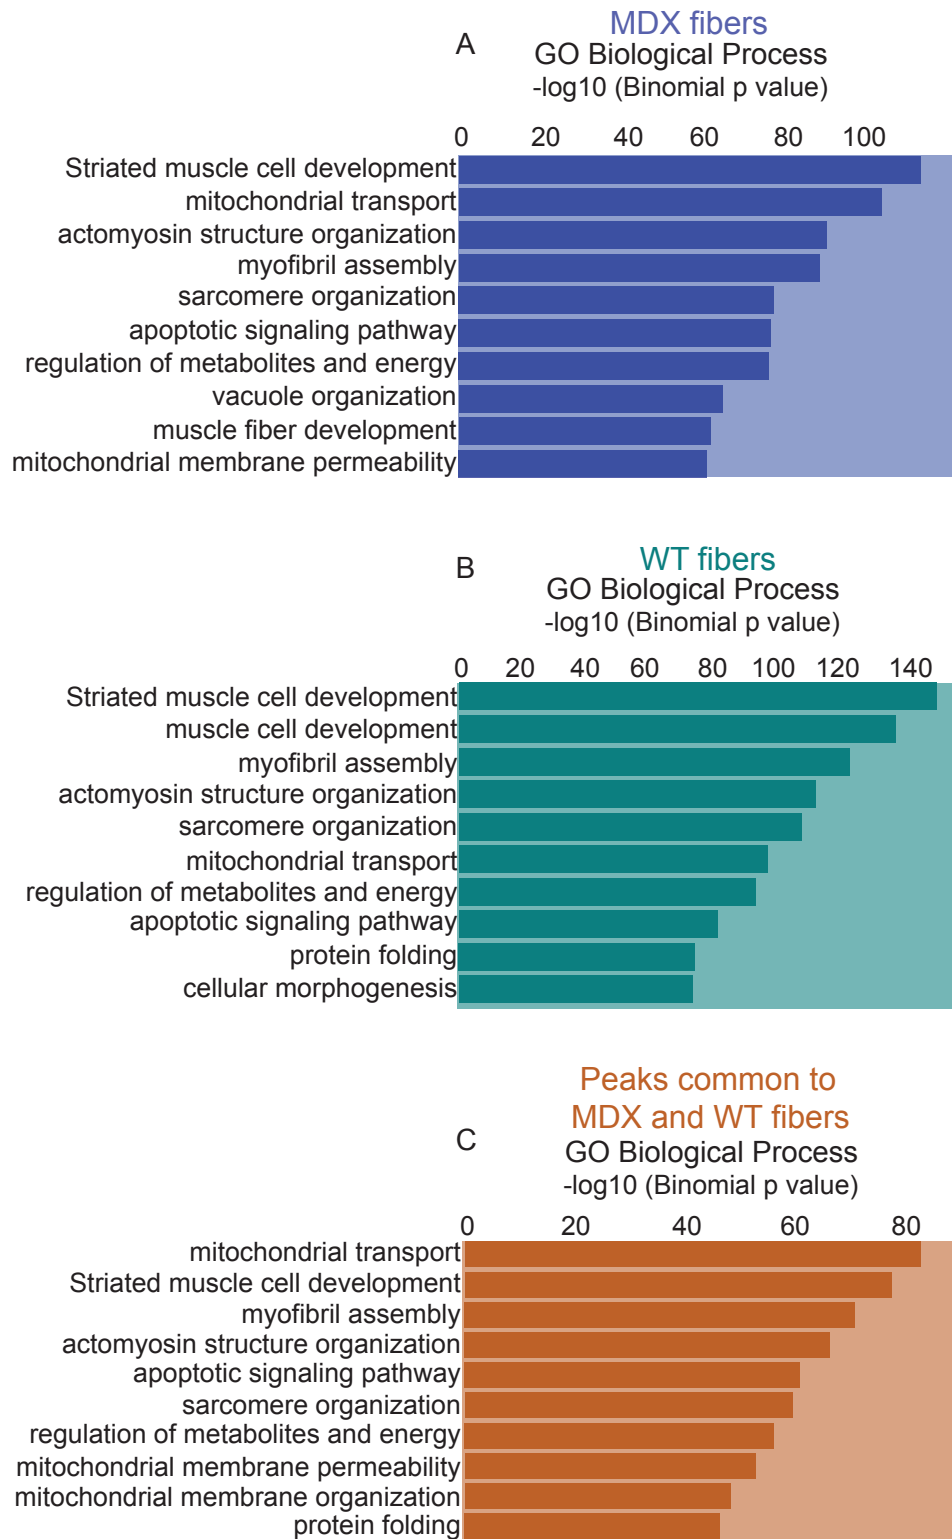

Supplement: supp [file elife-72792-supp-v1.zip › elife_poa_e72792_Figure_6_figure_supplement_3.pdf]

Figure 6 - Figure Supplement 4

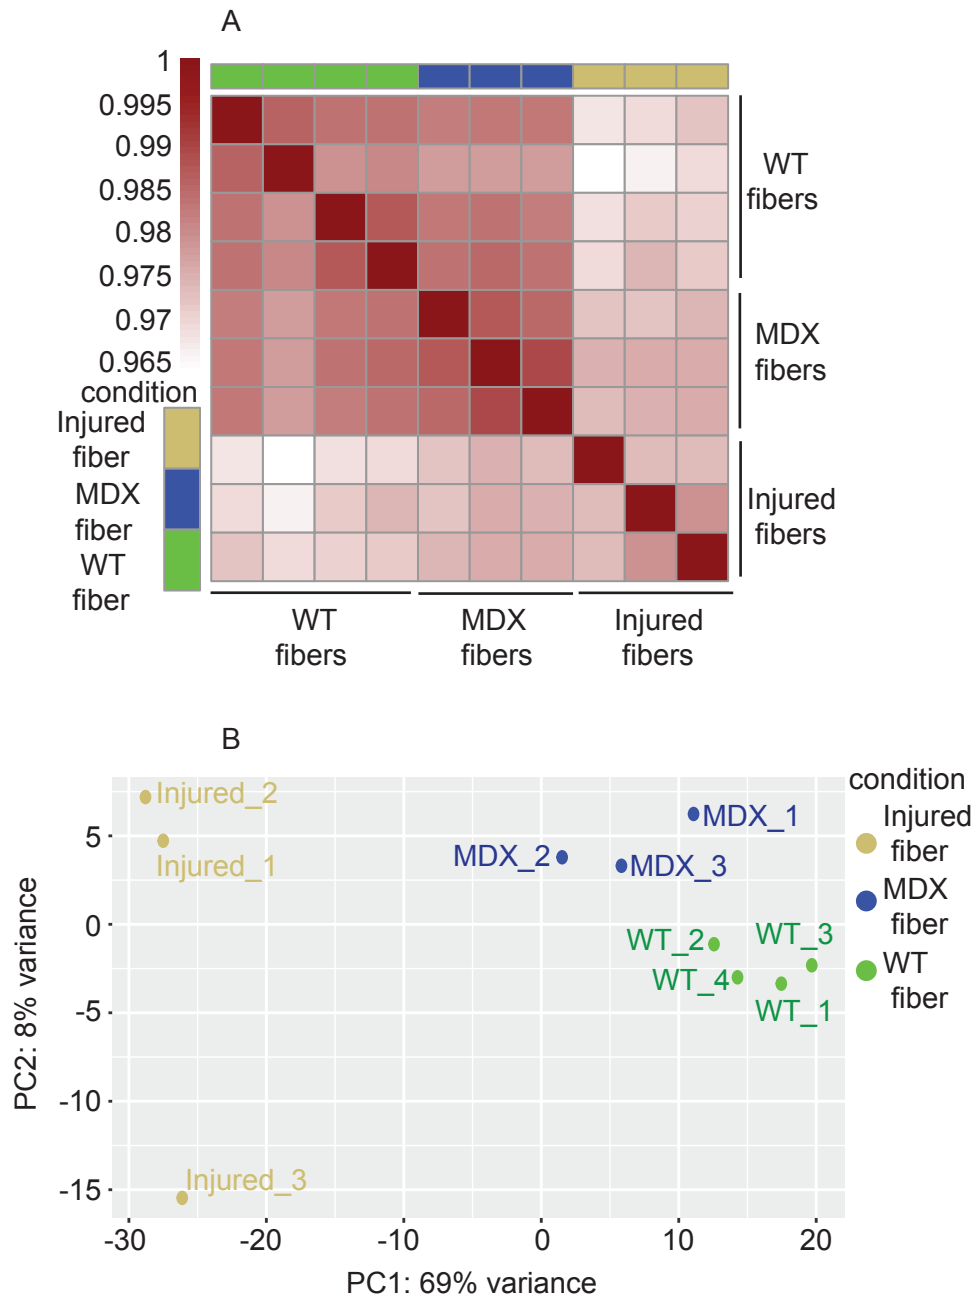

Supplement: supp [file elife-72792-supp-v1.zip › elife_poa_e72792_Figure_6_figure_supplement_4.pdf]

Figure 6 - Figure Supplement 5

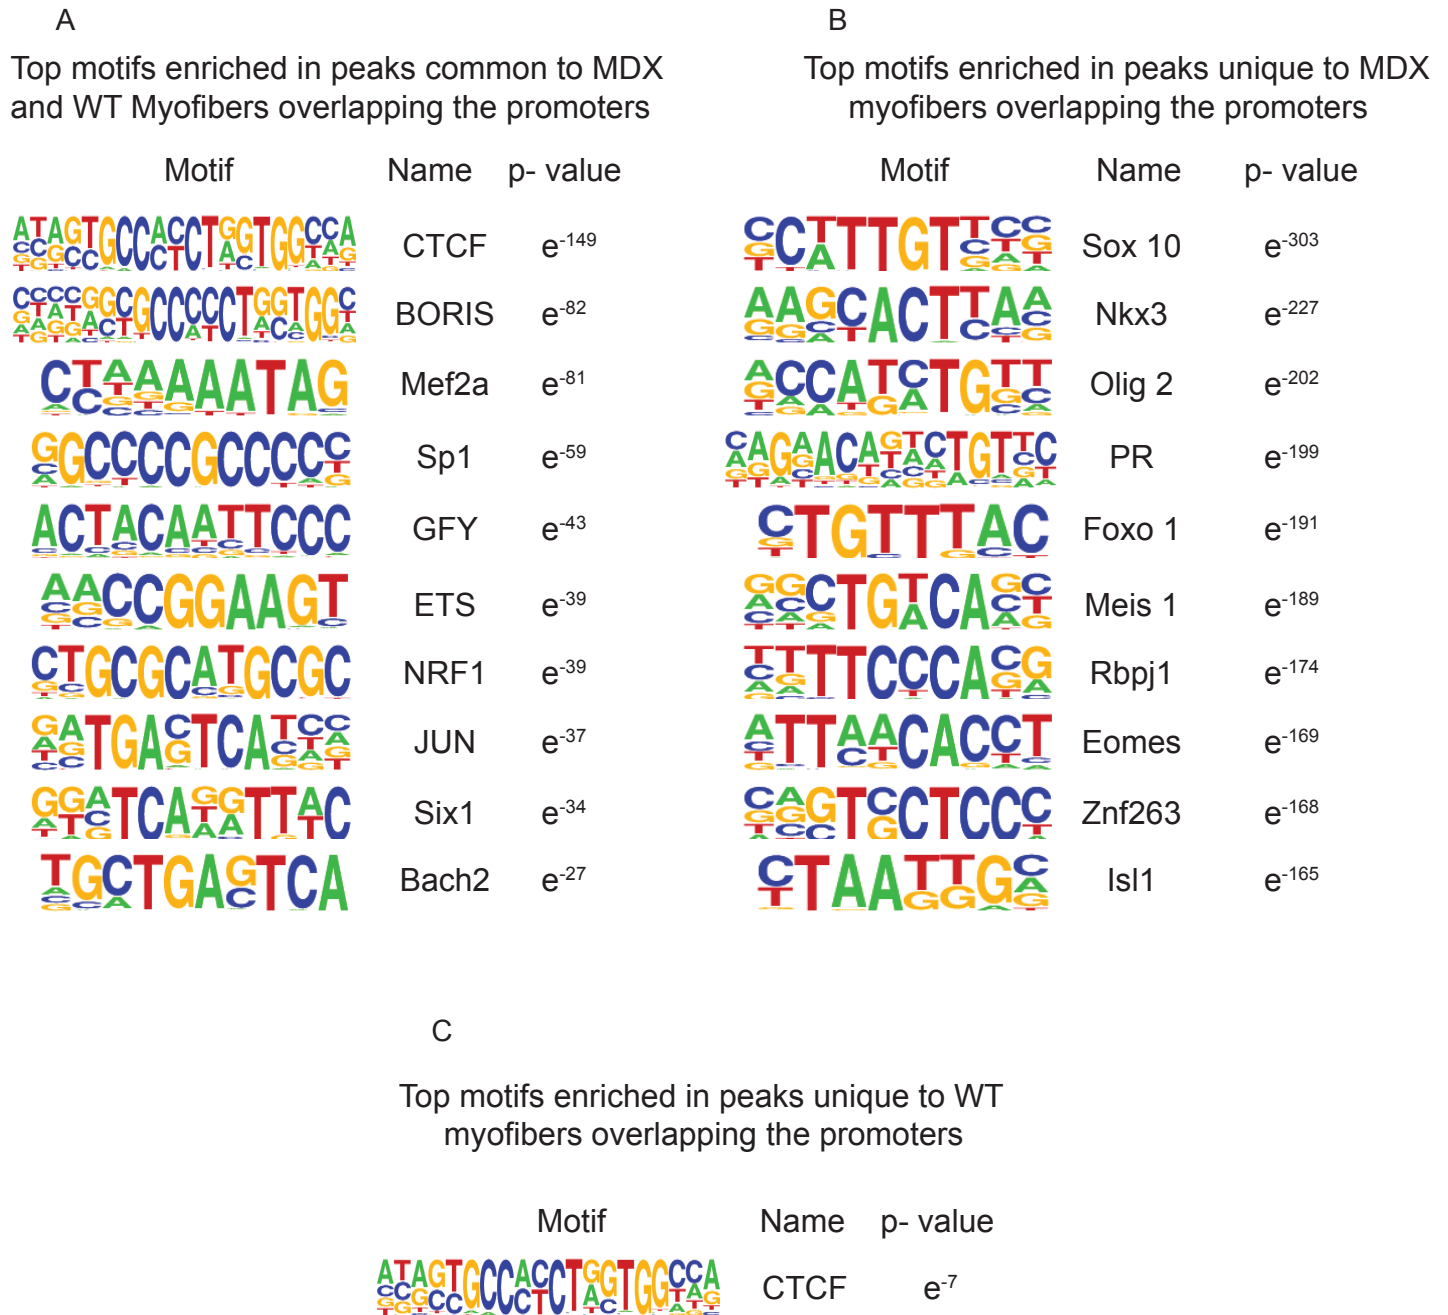

Supplement: supp [file elife-72792-supp-v1.zip › elife_poa_e72792_Figure_6_figure_supplement_5.pdf]

MuSC1  
MuSC2  
MuSC3

Uninjured Myofiber

MuSC1  
MuSC2  
MuSC3

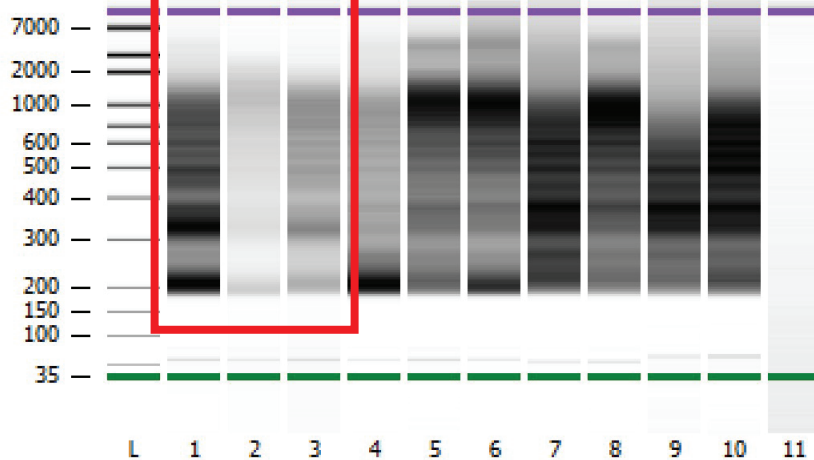

Supplement: supp [file Figure 1 figure supplement 1 labelled images source data 1.pdf › Figure 1 figure supplement 1 labelled images source data 1.pdf]
